# Supplementary material
Source: PubMed Central journal article supplement (PMC7846477)
Supplement: mmc1.pdf [file mmc1.pdf]

## Supplementary Material

### Screening Possible Drug Molecules for Covid-19. The Example of Vanadium (III/IV/V) Complex Molecules with Computational Chemistry and Molecular Docking.

Manos C. Vlasiou\* and Kyriaki S. Pafiti

**Table A1.** Calculated Huckel Charges of Vbicah, Vbdeah and Vtocdea complex molecules.

| Vbicah | Huckel Charges | Vbdeah | Huckel Charges | Vtocdea | Huckel Charges |
|--------|----------------|--------|----------------|---------|----------------|
| C(1)   | 0.580045       | C(1)   | 0.49443        | C(1)    | 0.482146       |
| C(2)   | 0.348572       | C(2)   | 0.446314       | C(2)    | 0.0187917      |
| C(3)   | -0.0170939     | C(3)   | -0.0672        | C(3)    | 0.10197        |
| C(4)   | 0.522331       | C(4)   | 0.462057       | C(4)    | 0.468077       |
| C(5)   | 0.19997        | C(5)   | 0.210345       | C(5)    | 0.213254       |
| C(6)   | 0.0978725      | C(6)   | -0.0169052     | C(6)    | 0.127701       |
| O(7)   | 0.314848       | C(7)   | 0.0917216      | O(7)    | 1.30517        |
| C(8)   | 0.17631        | O(8)   | -0.0899862     | C(8)    | 0.400773       |
| N(9)   | 1.29941        | C(9)   | 0.156815       | C(9)    | 0.0523533      |
| V(10)  | -5.01766       | O(10)  | 0.311305       | C(10)   | 0.00680537     |
| O(11)  | -0.399955      | N(11)  | 1.13708        | C(11)   | 0.0899916      |
| O(12)  | -0.381017      | N(12)  | 1.10787        | O(12)   | -0.19116       |
| O(13)  | -0.0400305     | C(13)  | 0.0199996      | N(13)   | 1.03515        |
| O(14)  | -0.348098      | C(14)  | 0.11513        | C(14)   | -0.0936385     |
| C(15)  | 0.699344       | O(15)  | -0.788696      | C(15)   | -0.025997      |
| C(16)  | 0.317369       | V(16)  | -0.154612      | C(16)   | -0.0619843     |
| O(17)  | 0.273057       | O(17)  | -1.55762       | C(17)   | -0.0612044     |
| C(18)  | 0.354431       | C(18)  | 0.00473522     | C(18)   | 0.0168623      |
| C(19)  | 0.689275       | C(19)  | 0.17356        | C(19)   | -0.136021      |
| O(20)  | 0.502122       | O(20)  | -0.804517      | C(20)   | -0.0744028     |
| C(21)  | 0.111418       | V(21)  | 0.059237       | C(21)   | -0.063897      |
| O(22)  | -0.0847671     | C(22)  | 0.0830728      | C(22)   | 0.0122581      |
| V(23)  | -2.39426       | C(23)  | 0.164087       | C(23)   | -0.137169      |
| N(24)  | 0.965976       | O(24)  | -0.85131       | C(24)   | -0.0673531     |
| O(25)  | -0.261555      | O(25)  | -1.57602       | C(25)   | -0.0643827     |
| O(26)  | -0.259292      | O(26)  | -0.557166      | C(26)   | -0.0651897     |
| C(27)  | 0.0379175      | C(27)  | 0.12782        | C(27)   | 0.0156634      |
| C(28)  | 0.655078       | C(28)  | 0.351004       | C(28)   | -0.139074      |

|       |             |       |            |       |            |
|-------|-------------|-------|------------|-------|------------|
| O(29) | -0.698073   | H(29) | 0.0413037  | C(29) | -0.0575149 |
| O(30) | -0.447761   | H(30) | 0.0483916  | C(30) | -0.132214  |
| C(31) | -0.00886097 | H(31) | 0.0768194  | C(31) | 0.0187057  |
| C(32) | 0.628706    | H(32) | 0.0528134  | C(32) | 0.0134052  |
| O(33) | -0.729699   | H(33) | 0.146213   | C(33) | 0.15689    |
| O(34) | -0.50866    | H(34) | 0.0734207  | O(34) | -0.901521  |
| H(35) | 0.0539011   | H(35) | 0.0261517  | C(35) | 0.159022   |
| H(36) | 0.0489056   | H(36) | 0.0538303  | O(36) | -0.812782  |
| H(37) | 0.0501808   | H(37) | 0.0177339  | V(37) | -2.03729   |
| H(38) | 0.0990761   | H(38) | 0.0126372  | O(38) | -1.34839   |
| H(39) | 0.299025    | H(39) | 0.0606808  | H(39) | 0.0423643  |
| H(40) | 0.297901    | H(40) | 0.0204521  | H(40) | 0.0460513  |
| H(41) | 0.306115    | H(41) | 0.00467896 | H(41) | 0.0314613  |
| H(42) | 0.276179    | H(42) | 0.00705491 | H(42) | 0.039438   |
| H(43) | 0.0668951   | H(43) | 0.103364   | H(43) | 0.0479422  |
| H(44) | 0.0926314   | H(44) | 0.0729022  | H(44) | 0.0599681  |
| H(45) | 0.0487188   | H(45) | 0.0224795  | H(45) | 0.0714341  |
| H(46) | 0.0358278   | H(46) | 0.0103498  | H(46) | 0.040044   |
| H(47) | 0.0538782   | H(47) | 0.0102592  | H(47) | 0.0424324  |
| H(48) | 0.0476171   | H(48) | 0.0118923  | H(48) | 0.0397421  |
| H(49) | 0.199338    | H(49) | 0.0399236  | H(49) | 0.0415473  |
| H(50) | 0.203885    | H(50) | 0.0340878  | H(50) | 0.0358497  |
| H(51) | 0.201079    |       |            | H(51) | 0.036166   |
| H(52) | 0.206134    |       |            | H(52) | 0.035693   |
| H(53) | 0.0469772   |       |            | H(53) | 0.0312486  |
| H(54) | 0.0578191   |       |            | H(54) | 0.0295127  |
| H(55) | 0.0753729   |       |            | H(55) | 0.0296784  |
| H(56) | 0.0552683   |       |            | H(56) | 0.0236452  |
|       |             |       |            | H(57) | 0.0378934  |
|       |             |       |            | H(58) | 0.0378401  |
|       |             |       |            | H(59) | 0.0389607  |
|       |             |       |            | H(60) | 0.0322053  |
|       |             |       |            | H(61) | 0.0303026  |
|       |             |       |            | H(62) | 0.0292396  |
|       |             |       |            | H(63) | 0.0289748  |
|       |             |       |            | H(64) | 0.0246851  |
|       |             |       |            | H(65) | 0.0389941  |
|       |             |       |            | H(66) | 0.0381981  |
|       |             |       |            | H(67) | 0.0392517  |
|       |             |       |            | H(68) | 0.0299387  |
|       |             |       |            | H(69) | 0.0293381  |

|  |  |  |  |       |            |
|--|--|--|--|-------|------------|
|  |  |  |  | H(70) | 0.0314082  |
|  |  |  |  | H(71) | 0.0314451  |
|  |  |  |  | H(72) | 0.0287001  |
|  |  |  |  | H(73) | 0.0289565  |
|  |  |  |  | H(74) | 0.0240962  |
|  |  |  |  | H(75) | 0.0396736  |
|  |  |  |  | H(76) | 0.0400008  |
|  |  |  |  | H(77) | 0.0384639  |
|  |  |  |  | H(78) | 0.0300364  |
|  |  |  |  | H(79) | 0.0310464  |
|  |  |  |  | H(80) | 0.0394725  |
|  |  |  |  | H(81) | 0.0404754  |
|  |  |  |  | H(82) | 0.0391249  |
|  |  |  |  | H(83) | 0.0362754  |
|  |  |  |  | H(84) | 0.039634   |
|  |  |  |  | H(85) | 0.0452334  |
|  |  |  |  | H(86) | 0.0251958  |
|  |  |  |  | H(87) | 0.00891232 |
|  |  |  |  | H(88) | 0.00663621 |
|  |  |  |  | H(89) | 0.0073135  |
|  |  |  |  | H(90) | 0.00405208 |

**Table A2.** Calculated Huckel Charges of Vtcdpa, VXn and Xn molecules.

| <b>Vtcdpa</b> | <b>Huckel Charges</b> | <b>VXn</b> | <b>Huckel Charges</b> | <b>Xn</b> | <b>Huckel Charges</b> |
|---------------|-----------------------|------------|-----------------------|-----------|-----------------------|
| C(1)          | 0.419798              | C(1)       | 0.515337              | C(1)      | 0.489453              |
| C(2)          | 0.0204756             | C(2)       | 0.346823              | C(2)      | -0.449828             |
| C(3)          | 0.463504              | C(3)       | 0.561402              | C(3)      | 0.328341              |
| C(4)          | 0.563787              | C(4)       | 0.650781              | C(4)      | -0.347411             |
| C(5)          | 0.06304               | C(5)       | 0.58501               | C(5)      | 0.249433              |
| C(6)          | 0.316265              | C(6)       | 0.758488              | C(6)      | -0.322414             |
| O(7)          | 0.784132              | C(7)       | 0.118211              | O(7)      | -0.102596             |
| C(8)          | 0.355164              | C(8)       | 0.082692              | O(8)      | -0.235126             |
| C(9)          | 0.0214997             | C(9)       | 0.576125              | O(9)      | -0.220966             |
| C(10)         | 8.95E-05              | C(10)      | 0.709052              | C(10)     | 0.0999393             |
| C(11)         | -0.06714              | C(11)      | -0.0818696            | C(11)     | 0.00318307            |
| O(12)         | -0.328968             | C(12)      | -0.0750682            | C(12)     | -0.19478              |
| C(13)         | 0.0673721             | C(13)      | 0.332415              | C(13)     | 0.10463               |
| N(14)         | 0.521475              | C(14)      | 0.348918              | C(14)     | -0.129989             |
| C(15)         | 0.0421974             | C(15)      | 0.140068              | C(15)     | -0.112219             |
| C(16)         | 0.279718              | C(16)      | 0.297491              | C(16)     | 0.432155              |
| C(17)         | 0.0546019             | C(17)      | 0.0593446             | C(17)     | -0.199775             |
| C(18)         | 0.59186               | C(18)      | 0.0183381             | O(18)     | -0.822967             |

|       |            |       |           |        |            |
|-------|------------|-------|-----------|--------|------------|
| C(19) | 0.305166   | C(19) | 0.485274  | C(19)  | 0.0805369  |
| C(20) | 0.189072   | C(20) | 0.142736  | C(20)  | 0.0911981  |
| C(21) | 0.420933   | C(21) | 0.0690432 | C(21)  | 0.00335463 |
| C(22) | 0.330746   | O(22) | -0.9204   | C(22)  | -0.16994   |
| N(23) | 0.513953   | O(23) | 0.629645  | C(23)  | 0.408585   |
| C(24) | -0.0607976 | O(24) | 0.36391   | C(24)  | -0.28603   |
| C(25) | 0.00291174 | O(25) | 0.89508   | C(25)  | 0.0161162  |
| C(26) | -0.0500697 | O(26) | -0.326282 | O(26)  | -0.156392  |
| C(27) | 0.119293   | O(27) | 0.618078  | H(27)  | 0.0454828  |
| N(28) | 0.438243   | V(28) | -6.36927  | H(28)  | 0.205006   |
| C(29) | -0.133838  | O(29) | -1.55507  | H(29)  | 0.203054   |
| C(30) | -0.0493508 | H(30) | 0.0526822 | H(30)  | 0.0278997  |
| C(31) | -0.0632754 | O(31) | -0.971041 | H(31)  | 0.0239943  |
| C(32) | -0.0616841 | H(32) | 0.062907  | H(32)  | 0.0221532  |
| C(33) | 0.0107518  | H(33) | 0.209558  | H(33)  | 0.0304406  |
| C(34) | -0.0688325 | H(34) | 0.0305389 | H(34)  | 0.0328133  |
| C(35) | -0.0684232 | H(35) | 0.0461123 | H(35)  | 0.0289073  |
| C(36) | -0.0602353 | H(36) | 0.0577836 | H(36)  | 0.0413601  |
| C(37) | 0.0097369  | H(37) | 0.0722673 | H(37)  | 0.0456956  |
| C(38) | -0.0691869 | H(38) | 0.0618072 | H(38)  | 0.0583437  |
| C(39) | -0.0648734 | H(39) | 0.0509276 | H(39)  | 0.0508024  |
| C(40) | -0.0642284 | H(40) | 0.0928256 | H(40)  | 0.0459865  |
| C(41) | 0.0238063  | H(41) | 0.0459481 | H(41)  | 0.0375112  |
| C(42) | -0.137351  | H(42) | 0.052778  | H(42)  | 0.0456858  |
| C(43) | -0.130275  | H(43) | 0.0959013 | H(43)  | 0.0460971  |
| C(44) | -0.130442  | H(44) | 0.0546055 | H(44)  | 0.0468322  |
| C(45) | -0.133905  | H(45) | 0.110531  | H(45)  | 0.0734013  |
| V(46) | -5.92233   | H(46) | 0.0413938 | H(46)  | 0.061105   |
| O(47) | -1.44939   | H(47) | 0.0474735 | H(47)  | 0.0647153  |
| H(48) | 0.0628903  | H(48) | 0.0475419 | H(48)  | 0.20622    |
| H(49) | 0.0377695  | H(49) | 0.0521658 | Lp(49) |            |
| H(50) | 0.0302968  | H(50) | 0.0554939 | Lp(50) |            |
| H(51) | 0.0373463  | H(51) | 0.0514366 | Lp(51) |            |
| H(52) | 0.0494727  | H(52) | 0.206622  | Lp(52) |            |
| H(53) | 0.0514549  | H(53) | 0.196543  | Lp(53) |            |
| H(54) | 0.0744793  | H(54) | 0.198889  | Lp(54) |            |
| H(55) | 0.0472077  |       |           | Lp(55) |            |
| H(56) | 0.0536293  |       |           | Lp(56) |            |
| H(57) | 0.0442329  |       |           | Lp(57) |            |
| H(58) | 0.0334623  |       |           | Lp(58) |            |
| H(59) | 0.0338931  |       |           |        |            |
| H(60) | 0.0636614  |       |           |        |            |
| H(61) | 0.0514705  |       |           |        |            |

|        |           |  |  |  |  |
|--------|-----------|--|--|--|--|
| H(62)  | 0.0233667 |  |  |  |  |
| H(63)  | 0.0370249 |  |  |  |  |
| H(64)  | 0.0472213 |  |  |  |  |
| H(65)  | 0.0163073 |  |  |  |  |
| H(66)  | 0.0423585 |  |  |  |  |
| H(67)  | 0.0503505 |  |  |  |  |
| H(68)  | 0.042647  |  |  |  |  |
| H(69)  | 0.0411613 |  |  |  |  |
| H(70)  | 0.0427254 |  |  |  |  |
| H(71)  | 0.0410222 |  |  |  |  |
| H(72)  | 0.0394789 |  |  |  |  |
| H(73)  | 0.0395465 |  |  |  |  |
| H(74)  | 0.0345641 |  |  |  |  |
| H(75)  | 0.0321036 |  |  |  |  |
| H(76)  | 0.0361535 |  |  |  |  |
| H(77)  | 0.0311012 |  |  |  |  |
| H(78)  | 0.0282446 |  |  |  |  |
| H(79)  | 0.0224237 |  |  |  |  |
| H(80)  | 0.0301435 |  |  |  |  |
| H(81)  | 0.0300629 |  |  |  |  |
| H(82)  | 0.0296185 |  |  |  |  |
| H(83)  | 0.0372681 |  |  |  |  |
| H(84)  | 0.02838   |  |  |  |  |
| H(85)  | 0.0279846 |  |  |  |  |
| H(86)  | 0.0225794 |  |  |  |  |
| H(87)  | 0.0304569 |  |  |  |  |
| H(88)  | 0.0304633 |  |  |  |  |
| H(89)  | 0.0294534 |  |  |  |  |
| H(90)  | 0.0340172 |  |  |  |  |
| H(91)  | 0.0308375 |  |  |  |  |
| H(92)  | 0.0284354 |  |  |  |  |
| H(93)  | 0.0230726 |  |  |  |  |
| H(94)  | 0.0384691 |  |  |  |  |
| H(95)  | 0.0395383 |  |  |  |  |
| H(96)  | 0.0393306 |  |  |  |  |
| H(97)  | 0.0368726 |  |  |  |  |
| H(98)  | 0.0368197 |  |  |  |  |
| H(99)  | 0.0374599 |  |  |  |  |
| H(100) | 0.036831  |  |  |  |  |
| H(101) | 0.0368054 |  |  |  |  |
| H(102) | 0.037387  |  |  |  |  |
| H(103) | 0.0374827 |  |  |  |  |
| H(104) | 0.0374453 |  |  |  |  |

|        |           |  |  |  |  |
|--------|-----------|--|--|--|--|
| H(105) | 0.0387288 |  |  |  |  |
|--------|-----------|--|--|--|--|

**Table B.** Calculated bond lengths and bond angles in angstroms for the studies molecules.

| Vtodeca       | Actual A | Vtodeca           | Actual A | Vtodeca       | Actual A | Vtodeca             | Actual A | VXn          | Actual A | VXn                 | Actual A |
|---------------|----------|-------------------|----------|---------------|----------|---------------------|----------|--------------|----------|---------------------|----------|
| O(39)-Lp(101) | 0.6087   | H(82)-C(28)-H(81) | 109.2602 | O(48)-Lp(114) | 0.5812   | H(105)-C(43)-H(103) | 108.8083 | O(32)-Lp(70) | 0.6363   | Lp(68)-O(28)-Lp(67) | 106.9009 |
| O(39)-Lp(100) | 0.6556   | H(82)-C(28)-H(80) | 117.8848 | O(48)-Lp(113) | 0.6002   | H(105)-C(43)-H(104) | 109.2252 | O(32)-Lp(69) | 0.6242   | Lp(68)-O(28)-H(52)  | 94.3858  |
| O(37)-Lp(99)  | 0.64     | H(82)-C(28)-C(27) | 104.33   | O(46)-Lp(112) | 0.6108   | H(105)-C(43)-C(39)  | 100.5237 | O(28)-Lp(68) | 0.6208   | Lp(68)-O(28)-C(19)  | 113.4661 |
| O(37)-Lp(98)  | 0.6129   | H(81)-C(28)-H(80) | 104.257  | O(46)-Lp(111) | 0.6049   | H(103)-C(43)-H(104) | 111.5541 | O(28)-Lp(67) | 0.6407   | Lp(67)-O(28)-H(52)  | 111.538  |
| O(36)-Lp(97)  | 0.6013   | H(81)-C(28)-C(27) | 117.4597 | O(45)-Lp(110) | 0.5741   | H(103)-C(43)-C(39)  | 114.2585 | O(27)-Lp(66) | 0.5801   | Lp(67)-O(28)-C(19)  | 109.0908 |
| O(36)-Lp(96)  | 0.5428   | H(80)-C(28)-C(27) | 104.1814 | O(45)-Lp(109) | 0.5658   | H(104)-C(43)-C(39)  | 111.7972 | O(27)-Lp(65) | 0.5838   | H(52)-O(28)-C(19)   | 120.14   |
| O(35)-Lp(95)  | 0.6391   | H(79)-C(27)-H(78) | 104.5149 | N(26)-Lp(108) | 0.5557   | H(95)-C(40)-H(96)   | 99.0777  | O(26)-Lp(64) | 0.5929   | H(50)-C(20)-C(21)   | 110.2846 |
| O(35)-Lp(94)  | 0.6366   | H(79)-C(27)-C(28) | 100.8536 | N(21)-Lp(107) | 0.5575   | H(95)-C(40)-H(94)   | 112.951  | O(26)-Lp(63) | 0.5824   | H(50)-C(20)-C(19)   | 110.6856 |
| O(34)-Lp(93)  | 0.666    | H(79)-C(27)-C(25) | 108.4351 | N(12)-Lp(106) | 0.5974   | H(95)-C(40)-C(39)   | 105.9014 | O(25)-Lp(62) | 0.6177   | C(21)-C(20)-C(19)   | 108.9745 |
| O(34)-Lp(92)  | 0.5849   | H(78)-C(27)-C(28) | 111.7498 | V(47)-O(48)   | 1.8431   | H(96)-C(40)-H(94)   | 111.8079 | O(25)-Lp(61) | 0.637    | O(28)-C(19)-C(20)   | 106.4634 |
| N(11)-Lp(91)  | 0.687    | H(78)-C(27)-C(25) | 108.4099 | O(46)-V(47)   | 1.8641   | H(96)-C(40)-C(39)   | 106.9929 | O(24)-Lp(60) | 0.5466   | O(28)-C(19)-C(18)   | 110.141  |
| V(38)-O(39)   | 1.8468   | C(28)-C(27)-C(25) | 121.3264 | C(43)-H(105)  | 1.1222   | H(94)-C(40)-C(39)   | 118.2108 | O(24)-Lp(59) | 0.5731   | C(20)-C(19)-C(18)   | 106.6548 |
| O(37)-V(38)   | 1.8537   | H(77)-C(26)-H(76) | 111.3373 | C(43)-H(103)  | 1.1253   | H(93)-C(39)-C(40)   | 114.0841 | O(23)-Lp(58) | 0.6081   | H(51)-C(21)-C(20)   | 110.985  |
| O(36)-V(38)   | 1.8915   | H(77)-C(26)-H(75) | 106.1848 | C(43)-H(104)  | 1.1228   | H(93)-C(39)-C(43)   | 104.6968 | O(23)-Lp(57) | 0.6548   | H(51)-C(21)-C(16)   | 104.0613 |
| O(35)-V(38)   | 1.8509   | H(77)-C(26)-C(25) | 118.5644 | C(42)-H(101)  | 1.1079   | H(93)-C(39)-C(38)   | 105.5641 | O(22)-Lp(56) | 0.5623   | C(20)-C(21)-C(16)   | 108.0972 |
| C(32)-H(90)   | 1.0837   | H(76)-C(26)-H(75) | 99.8573  | C(42)-H(102)  | 1.1334   | C(40)-C(39)-C(43)   | 110.7406 | O(22)-Lp(55) | 0.603    | H(49)-C(18)-C(19)   | 91.5317  |
| C(32)-H(89)   | 1.0944   | H(76)-C(26)-C(25) | 108.6409 | C(42)-H(100)  | 1.0718   | C(40)-C(39)-C(38)   | 111.857  | O(32)-H(54)  | 0.9325   | H(49)-C(18)-C(17)   | 105.5448 |
| C(32)-O(37)   | 1.4489   | H(75)-C(26)-C(25) | 110.6252 | C(41)-H(98)   | 1.0922   | C(43)-C(39)-C(38)   | 109.5157 | V(29)-O(32)  | 1.8881   | C(19)-C(18)-C(17)   | 113.9392 |
| C(31)-H(88)   | 1.0887   | H(74)-C(25)-C(27) | 106.6581 | C(41)-H(97)   | 1.0661   | H(91)-C(38)-H(92)   | 107.9712 | O(28)-H(52)  | 0.9207   | Lp(70)-O(32)-Lp(69) | 113.7532 |
| C(31)-H(87)   | 1.1143   | H(74)-C(25)-C(26) | 113.7361 | C(41)-H(99)   | 1.0497   | H(91)-C(38)-C(39)   | 113.2283 | O(27)-V(29)  | 1.8785   | Lp(70)-O(32)-H(54)  | 111.8959 |

|             |        |                   |          |             |        |                     |          |             |        |                     |          |
|-------------|--------|-------------------|----------|-------------|--------|---------------------|----------|-------------|--------|---------------------|----------|
| C(31)-O(36) | 1.4313 | H(74)-C(25)-C(24) | 101.7749 | C(40)-H(95) | 1.1833 | H(91)-C(38)-C(37)   | 114.1112 | O(25)-V(29) | 1.8545 | Lp(70)-O(32)-V(29)  | 105.4456 |
| C(30)-H(86) | 1.1533 | C(27)-C(25)-C(26) | 110.5571 | C(40)-H(96) | 1.1268 | H(92)-C(38)-C(39)   | 106.1736 | O(24)-H(34) | 0.9336 | Lp(69)-O(32)-H(54)  | 110.4845 |
| C(30)-H(85) | 1.1562 | C(27)-C(25)-C(24) | 112.4737 | C(40)-H(94) | 1.0872 | H(92)-C(38)-C(37)   | 100.8997 | O(23)-H(53) | 0.9958 | Lp(69)-O(32)-V(29)  | 112.9687 |
| C(30)-C(32) | 1.5322 | C(26)-C(25)-C(24) | 111.3235 | C(39)-H(93) | 1.117  | C(39)-C(38)-C(37)   | 113.2232 | O(23)-V(29) | 1.8908 | H(54)-O(32)-V(29)   | 101.5699 |
| C(29)-H(84) | 1.0737 | H(73)-C(24)-H(72) | 116.3998 | C(39)-C(40) | 1.5553 | H(101)-C(42)-H(102) | 99.7182  | O(22)-V(29) | 1.8422 | Lp(56)-O(22)-Lp(55) | 106.6523 |
| C(29)-H(83) | 1.1248 | H(73)-C(24)-C(25) | 99.168   | C(39)-C(43) | 1.5325 | H(101)-C(42)-H(100) | 108.8602 | C(21)-H(51) | 1.1278 | Lp(56)-O(22)-V(29)  | 106.2453 |
| C(29)-C(31) | 1.4993 | H(73)-C(24)-C(23) | 105.4882 | C(38)-H(91) | 1.1443 | H(101)-C(42)-C(35)  | 115.5768 | C(20)-H(50) | 1.1107 | Lp(55)-O(22)-V(29)  | 113.8428 |
| C(28)-H(82) | 1.068  | H(72)-C(24)-C(25) | 118.9989 | C(38)-H(92) | 1.1258 | H(102)-C(42)-H(100) | 106.2766 | C(20)-C(21) | 1.5479 | H(48)-C(17)-C(18)   | 117.1523 |
| C(28)-H(81) | 1.128  | H(72)-C(24)-C(23) | 99.8058  | C(38)-C(39) | 1.5074 | H(102)-C(42)-C(35)  | 110.2244 | C(19)-O(28) | 1.4406 | H(48)-C(17)-C(16)   | 105.8704 |
| C(28)-H(80) | 1.1303 | C(25)-C(24)-C(23) | 117.0422 | C(37)-H(90) | 1.1234 | H(100)-C(42)-C(35)  | 114.7738 | C(19)-C(20) | 1.6176 | C(18)-C(17)-C(16)   | 109.4571 |
| C(27)-H(79) | 1.1155 | H(71)-C(23)-H(70) | 115.6253 | C(37)-H(89) | 1.142  | H(90)-C(37)-H(89)   | 104.2107 | C(18)-H(49) | 1.1208 | H(44)-C(12)-H(43)   | 105.7494 |
| C(27)-H(78) | 1.1631 | H(71)-C(23)-C(24) | 103.7861 | C(37)-C(38) | 1.5535 | H(90)-C(37)-C(38)   | 113.4093 | C(18)-C(19) | 1.5102 | H(44)-C(12)-H(42)   | 108.1308 |
| C(27)-C(28) | 1.5436 | H(71)-C(23)-C(22) | 104.0506 | C(36)-H(87) | 1.0981 | H(90)-C(37)-C(36)   | 98.3806  | C(17)-H(48) | 1.1351 | H(44)-C(12)-C(10)   | 107.4742 |
| C(26)-H(77) | 1.1168 | H(70)-C(23)-C(24) | 113.8074 | C(36)-H(88) | 1.0546 | H(89)-C(37)-C(38)   | 112.1036 | C(17)-C(18) | 1.506  | H(43)-C(12)-H(42)   | 112.1339 |
| C(26)-H(76) | 1.1202 | H(70)-C(23)-C(22) | 108.1135 | C(36)-C(37) | 1.5631 | H(89)-C(37)-C(36)   | 111.368  | C(16)-C(21) | 1.5346 | H(43)-C(12)-C(10)   | 114.2391 |
| C(26)-H(75) | 1.099  | C(24)-C(23)-C(22) | 111.0304 | C(35)-H(86) | 1.1045 | C(38)-C(37)-C(36)   | 116.0194 | C(16)-C(17) | 1.5755 | H(42)-C(12)-C(10)   | 108.8093 |
| C(25)-H(74) | 1.1646 | H(69)-C(22)-H(68) | 101.2205 | C(35)-C(42) | 1.533  | H(87)-C(36)-H(88)   | 101.0455 | C(15)-H(47) | 1.1059 | Lp(58)-O(23)-Lp(57) | 109.9878 |
| C(25)-C(27) | 1.5732 | H(69)-C(22)-C(23) | 112.6027 | C(35)-C(36) | 1.5358 | H(87)-C(36)-C(37)   | 109.3961 | C(15)-C(16) | 1.4817 | Lp(58)-O(23)-H(53)  | 104.2118 |
| C(25)-C(26) | 1.5056 | H(69)-C(22)-C(20) | 102.0044 | C(34)-H(85) | 1.147  | H(87)-C(36)-C(35)   | 115.9719 | C(14)-H(46) | 1.1271 | Lp(58)-O(23)-V(29)  | 97.2061  |
| C(24)-H(73) | 1.09   | H(68)-C(22)-C(23) | 110.2216 | C(34)-H(84) | 1.1584 | H(88)-C(36)-C(37)   | 109.9994 | C(14)-C(15) | 1.5564 | Lp(57)-O(23)-H(53)  | 110.8813 |
| C(24)-H(72) | 1.0652 | H(68)-C(22)-C(20) | 114.4831 | C(34)-C(35) | 1.5168 | H(88)-C(36)-C(35)   | 106.0391 | C(13)-H(45) | 1.0911 | Lp(57)-O(23)-V(29)  | 113.7465 |
| C(24)-C(25) | 1.5224 | C(23)-C(22)-C(20) | 115.1788 | C(33)-H(82) | 1.0481 | C(37)-C(36)-C(35)   | 113.4993 | C(13)-O(27) | 1.4099 | H(53)-O(23)-V(29)   | 119.1169 |
| C(23)-H(71) | 1.1305 | H(67)-C(21)-H(66) | 110.4944 | C(33)-H(83) | 1.0653 | H(86)-C(35)-C(42)   | 109.1623 | C(13)-C(14) | 1.5348 | C(21)-C(16)-C(17)   | 111.6978 |

|             |        |                   |          |             |        |                   |          |             |        |                     |          |
|-------------|--------|-------------------|----------|-------------|--------|-------------------|----------|-------------|--------|---------------------|----------|
| C(23)-H(70) | 1.1161 | H(67)-C(21)-H(65) | 112.0267 | C(33)-C(34) | 1.5604 | H(86)-C(35)-C(36) | 109.0347 | C(12)-H(44) | 1.1289 | C(21)-C(16)-C(15)   | 118.4134 |
| C(23)-C(24) | 1.5383 | H(67)-C(21)-C(20) | 107.7876 | C(32)-H(81) | 1.1411 | H(86)-C(35)-C(34) | 102.9017 | C(12)-H(43) | 1.1766 | C(17)-C(16)-C(15)   | 117.6047 |
| C(22)-H(69) | 1.075  | H(66)-C(21)-H(65) | 109.0873 | C(32)-H(80) | 1.1129 | C(42)-C(35)-C(36) | 105.7943 | C(12)-H(42) | 1.0772 | H(41)-C(11)-H(40)   | 111.9724 |
| C(22)-H(68) | 1.0454 | H(66)-C(21)-C(20) | 109.4694 | C(32)-C(33) | 1.5851 | C(42)-C(35)-C(34) | 119.6677 | C(11)-H(41) | 1.1529 | H(41)-C(11)-H(39)   | 100.0336 |
| C(22)-C(23) | 1.5366 | H(65)-C(21)-C(20) | 107.908  | C(31)-H(79) | 1.0878 | C(36)-C(35)-C(34) | 110.0012 | C(11)-H(40) | 1.1268 | H(41)-C(11)-C(10)   | 105.2171 |
| C(21)-H(67) | 1.1318 | H(64)-C(20)-C(22) | 101.7172 | C(31)-C(41) | 1.5469 | H(85)-C(34)-H(84) | 103.6445 | C(11)-H(39) | 1.1036 | H(40)-C(11)-H(39)   | 108.6657 |
| C(21)-H(66) | 1.1059 | H(64)-C(20)-C(21) | 113.0341 | C(31)-C(32) | 1.5769 | H(85)-C(34)-C(35) | 115.6899 | C(10)-C(12) | 1.5734 | H(40)-C(11)-C(10)   | 118.7998 |
| C(21)-H(65) | 1.103  | H(64)-C(20)-C(19) | 107.6715 | C(30)-H(78) | 1.108  | H(85)-C(34)-C(33) | 98.9023  | C(10)-C(11) | 1.5702 | H(39)-C(11)-C(10)   | 110.521  |
| C(20)-H(64) | 1.1613 | C(22)-C(20)-C(21) | 110.065  | C(30)-H(77) | 1.0858 | H(84)-C(34)-C(35) | 114.5739 | C(9)-H(38)  | 1.06   | Lp(66)-O(27)-Lp(65) | 125.2722 |
| C(20)-C(22) | 1.5732 | C(22)-C(20)-C(19) | 109.0214 | C(30)-C(31) | 1.4726 | H(84)-C(34)-C(33) | 104.134  | C(9)-C(10)  | 1.5211 | Lp(66)-O(27)-V(29)  | 109.2756 |
| C(20)-C(21) | 1.539  | C(21)-C(20)-C(19) | 114.5123 | C(29)-H(60) | 1.1264 | C(35)-C(34)-C(33) | 117.7294 | C(8)-H(31)  | 1.0958 | Lp(66)-O(27)-C(13)  | 104.0983 |
| C(19)-H(63) | 1.1039 | H(63)-C(19)-H(48) | 97.7547  | C(29)-H(76) | 1.1654 | H(98)-C(41)-H(97) | 101.7439 | C(8)-H(30)  | 1.0778 | Lp(65)-O(27)-V(29)  | 107.3179 |
| C(19)-H(48) | 1.1095 | H(63)-C(19)-C(20) | 110.5464 | C(29)-C(30) | 1.5444 | H(98)-C(41)-H(99) | 99.619   | C(8)-C(9)   | 1.4937 | Lp(65)-O(27)-C(13)  | 96.0817  |
| C(19)-C(20) | 1.5367 | H(63)-C(19)-C(18) | 107.9263 | C(28)-H(75) | 1.1538 | H(98)-C(41)-C(31) | 112.0768 | C(7)-H(37)  | 1.1414 | V(29)-O(27)-C(13)   | 114.3292 |
| C(18)-H(62) | 1.1313 | H(48)-C(19)-C(20) | 112.2968 | C(28)-H(74) | 1.2182 | H(97)-C(41)-H(99) | 106.1355 | C(7)-H(36)  | 1.1082 | H(47)-C(15)-C(16)   | 114.6566 |
| C(18)-H(61) | 1.1498 | H(48)-C(19)-C(18) | 112.8401 | C(28)-C(29) | 1.5464 | H(97)-C(41)-C(31) | 117.0192 | C(7)-H(35)  | 1.1228 | H(47)-C(15)-C(14)   | 115.8458 |
| C(18)-C(19) | 1.5992 | C(20)-C(19)-C(18) | 114.1636 | C(27)-H(72) | 1.1641 | H(99)-C(41)-C(31) | 117.7561 | C(7)-O(26)  | 1.4458 | C(16)-C(15)-C(14)   | 108.1699 |
| C(17)-H(60) | 1.1202 | H(62)-C(18)-H(61) | 113.7008 | C(27)-H(71) | 1.1189 | H(82)-C(33)-H(83) | 105.164  | C(6)-C(8)   | 1.5871 | C(12)-C(10)-C(11)   | 112.9002 |
| C(17)-H(59) | 1.1454 | H(62)-C(18)-C(19) | 111.9554 | C(27)-H(73) | 1.0879 | H(82)-C(33)-C(34) | 103.915  | C(5)-O(25)  | 1.3735 | C(12)-C(10)-C(9)    | 106.418  |
| C(17)-H(58) | 1.1678 | H(62)-C(18)-C(16) | 107.9592 | N(26)-V(47) | 1.9001 | H(82)-C(33)-C(32) | 115.4032 | C(5)-C(6)   | 1.5617 | C(11)-C(10)-C(9)    | 114.1427 |
| C(16)-H(57) | 1.0538 | H(61)-C(18)-C(19) | 103.6269 | C(25)-H(70) | 1.1007 | H(83)-C(33)-C(34) | 106.0008 | C(4)-C(13)  | 1.5041 | O(32)-V(29)-O(27)   | 153.0256 |
| C(16)-C(18) | 1.5572 | H(61)-C(18)-C(16) | 105.1165 | C(25)-N(26) | 1.4378 | H(83)-C(33)-C(32) | 108.8209 | C(4)-C(5)   | 1.464  | O(32)-V(29)-O(25)   | 110.6562 |
| C(16)-C(17) | 1.491  | C(19)-C(18)-C(16) | 114.3794 | C(24)-H(69) | 1.1302 | C(34)-C(33)-C(32) | 116.5786 | C(3)-O(26)  | 1.37   | O(32)-V(29)-O(23)   | 84.2806  |



|                 |        |                           |          |                 |        |                           |          |                |        |                             |          |
|-----------------|--------|---------------------------|----------|-----------------|--------|---------------------------|----------|----------------|--------|-----------------------------|----------|
| C(15)-<br>H(56) | 1.1733 | H(60)-<br>C(17)-<br>H(59) | 115.2769 | C(24)-<br>C(25) | 1.4982 | H(81)-<br>C(32)-<br>H(80) | 104.6365 | C(3)-<br>C(4)  | 1.5145 | O(32)-<br>V(29)-<br>O(22)   | 82.6586  |
| C(15)-<br>H(55) | 1.1012 | H(60)-<br>C(17)-<br>H(58) | 108.4532 | C(23)-<br>H(68) | 1.1779 | H(81)-<br>C(32)-<br>C(33) | 109.0424 | C(2)-<br>H(33) | 1.1428 | O(27)-<br>V(29)-<br>O(25)   | 89.3452  |
| C(15)-<br>C(16) | 1.614  | H(60)-<br>C(17)-<br>C(16) | 111.1314 | C(23)-<br>C(24) | 1.5137 | H(81)-<br>C(32)-<br>C(31) | 108.2743 | C(2)-<br>C(3)  | 1.4879 | O(27)-<br>V(29)-<br>O(23)   | 77.8419  |
| C(14)-<br>H(54) | 1.0719 | H(59)-<br>C(17)-<br>H(58) | 97.8862  | C(22)-<br>H(67) | 1.0473 | H(80)-<br>C(32)-<br>C(33) | 104.395  | C(1)-<br>O(24) | 1.3824 | O(27)-<br>V(29)-<br>O(22)   | 105.1864 |
| C(14)-<br>H(53) | 1.0656 | H(59)-<br>C(17)-<br>C(16) | 107.6611 | C(22)-<br>C(23) | 1.5039 | H(80)-<br>C(32)-<br>C(31) | 114.8312 | C(1)-<br>C(6)  | 1.4591 | O(25)-<br>V(29)-<br>O(23)   | 89.3205  |
| C(14)-<br>C(15) | 1.5487 | H(58)-<br>C(17)-<br>C(16) | 116.0103 | N(21)-<br>V(47) | 1.9661 | C(33)-<br>C(32)-<br>C(31) | 115.0641 | C(1)-<br>C(2)  | 1.4764 | O(25)-<br>V(29)-<br>O(22)   | 116.1534 |
| C(13)-<br>H(52) | 1.1403 | H(57)-<br>C(16)-<br>C(18) | 108.4831 | C(20)-<br>H(66) | 1.0987 | H(65)-<br>C(19)-<br>C(20) | 115.5016 |                |        | O(23)-<br>V(29)-<br>O(22)   | 154.163  |
| C(13)-<br>H(51) | 1.1103 | H(57)-<br>C(16)-<br>C(17) | 108.2208 | C(20)-<br>N(21) | 1.6145 | H(65)-<br>C(19)-<br>C(18) | 112.6693 |                |        | H(46)-<br>C(14)-<br>C(15)   | 113.8514 |
| C(13)-<br>C(14) | 1.5018 | H(57)-<br>C(16)-<br>C(15) | 100.1019 | C(19)-<br>H(65) | 1.0359 | C(20)-<br>C(19)-<br>C(18) | 60.4227  |                |        | H(46)-<br>C(14)-<br>C(13)   | 113.3486 |
| C(12)-<br>H(50) | 1.0929 | C(18)-<br>C(16)-<br>C(17) | 110.7474 | C(19)-<br>C(20) | 1.4892 | H(79)-<br>C(31)-<br>C(41) | 110.9735 |                |        | C(15)-<br>C(14)-<br>C(13)   | 124.473  |
| C(12)-<br>H(49) | 1.0756 | C(18)-<br>C(16)-<br>C(15) | 119.3353 | C(18)-<br>H(64) | 1.0782 | H(79)-<br>C(31)-<br>C(32) | 101.6908 |                |        | H(38)-<br>C(9)-<br>C(10)    | 114.8306 |
| C(12)-<br>H(33) | 1.1178 | C(17)-<br>C(16)-<br>C(15) | 109.0264 | C(18)-<br>C(20) | 1.4963 | H(79)-<br>C(31)-<br>C(30) | 110.8341 |                |        | H(38)-<br>C(9)-<br>C(8)     | 110.4653 |
| N(11)-<br>V(38) | 1.9521 | H(56)-<br>C(15)-<br>H(55) | 95.8398  | C(18)-<br>C(19) | 1.4844 | C(41)-<br>C(31)-<br>C(32) | 113.6392 |                |        | C(10)-<br>C(9)-<br>C(8)     | 107.6351 |
| N(11)-<br>C(30) | 1.6009 | H(56)-<br>C(15)-<br>C(16) | 112.854  | C(17)-<br>H(63) | 1.1057 | C(41)-<br>C(31)-<br>C(30) | 109.3271 |                |        | Lp(62)-<br>O(25)-<br>Lp(61) | 110.5758 |
| N(11)-<br>C(29) | 1.5781 | H(56)-<br>C(15)-<br>C(14) | 106.498  | C(17)-<br>N(21) | 1.6717 | C(32)-<br>C(31)-<br>C(30) | 110.2046 |                |        | Lp(62)-<br>O(25)-<br>V(29)  | 112.1578 |
| C(10)-<br>H(47) | 1.1289 | H(55)-<br>C(15)-<br>C(16) | 112.8045 | C(17)-<br>C(18) | 1.5039 | H(69)-<br>C(24)-<br>C(25) | 119.1926 |                |        | Lp(62)-<br>O(25)-<br>C(5)   | 96.7689  |
| C(10)-<br>H(46) | 1.1412 | H(55)-<br>C(15)-<br>C(14) | 100.6948 | C(16)-<br>N(21) | 1.6724 | H(69)-<br>C(24)-<br>C(23) | 107.3422 |                |        | Lp(61)-<br>O(25)-<br>V(29)  | 110.8359 |
| C(10)-<br>N(11) | 1.6562 | C(16)-<br>C(15)-<br>C(14) | 123.9817 | C(16)-<br>C(17) | 1.6122 | C(25)-<br>C(24)-<br>C(23) | 117.9176 |                |        | Lp(61)-<br>O(25)-<br>C(5)   | 105.0925 |
| C(9)-<br>H(45)  | 1.1407 | H(90)-<br>C(32)-<br>H(89) | 109.6039 | C(15)-<br>H(62) | 1.1353 | H(68)-<br>C(23)-<br>C(24) | 107.6801 |                |        | V(29)-<br>O(25)-<br>C(5)    | 120.4172 |
| C(9)-<br>H(44)  | 1.0989 | H(90)-<br>C(32)-<br>O(37) | 108.5449 | C(15)-<br>H(61) | 1.1633 | H(68)-<br>C(23)-<br>C(22) | 113.5932 |                |        | H(45)-<br>C(13)-<br>O(27)   | 108.0566 |
| C(8)-<br>H(43)  | 1.1017 | H(90)-<br>C(32)-<br>C(30) | 107.7182 | C(15)-<br>C(16) | 1.4821 | C(24)-<br>C(23)-<br>C(22) | 109.3353 |                |        | H(45)-<br>C(13)-<br>C(14)   | 109.4663 |
| C(8)-<br>H(42)  | 1.0729 | H(89)-<br>C(32)-<br>O(37) | 109.359  | C(14)-<br>C(22) | 1.5045 | H(66)-<br>C(20)-<br>N(21) | 112.3469 |                |        | H(45)-<br>C(13)-<br>C(4)    | 117.5777 |
| C(8)-<br>C(9)   | 1.5213 | H(89)-<br>C(32)-<br>C(30) | 115.8944 | C(14)-<br>N(26) | 1.4849 | H(66)-<br>C(20)-<br>C(19) | 132.1362 |                |        | O(27)-<br>C(13)-<br>C(14)   | 109.9937 |

|            |        |                   |          |             |        |                   |          |  |  |                     |          |
|------------|--------|-------------------|----------|-------------|--------|-------------------|----------|--|--|---------------------|----------|
| C(7)-O(34) | 1.3562 | O(37)-C(32)-C(30) | 105.4513 | C(13)-H(59) | 1.146  | H(66)-C(20)-C(18) | 129.2946 |  |  | O(27)-C(13)-C(4)    | 112.4164 |
| C(7)-C(8)  | 1.575  | H(54)-C(14)-H(53) | 99.224   | C(13)-H(44) | 1.1716 | N(21)-C(20)-C(19) | 113.1959 |  |  | C(14)-C(13)-C(4)    | 98.902   |
| C(7)-C(13) | 1.4883 | H(54)-C(14)-C(15) | 114.4457 | C(13)-C(14) | 1.54   | N(21)-C(20)-C(18) | 94.8038  |  |  | H(31)-C(8)-H(30)    | 119.0857 |
| C(7)-C(12) | 1.5943 | H(54)-C(14)-C(13) | 105.5365 | N(12)-V(47) | 1.9643 | C(19)-C(20)-C(18) | 59.6313  |  |  | H(31)-C(8)-C(9)     | 100.7551 |
| C(6)-C(10) | 1.5691 | H(53)-C(14)-C(15) | 111.2183 | N(12)-C(13) | 1.7124 | H(64)-C(18)-C(20) | 134.2366 |  |  | H(31)-C(8)-C(6)     | 110.5211 |
| C(5)-C(9)  | 1.5108 | H(53)-C(14)-C(13) | 112.9979 | N(12)-C(15) | 1.6337 | H(64)-C(18)-C(19) | 129.3398 |  |  | H(30)-C(8)-C(9)     | 109.4762 |
| C(5)-C(6)  | 1.5366 | C(15)-C(14)-C(13) | 112.6312 | C(11)-H(58) | 1.1323 | H(64)-C(18)-C(17) | 113.5028 |  |  | H(30)-C(8)-C(6)     | 107.2785 |
| C(4)-O(34) | 1.405  | H(88)-C(31)-H(87) | 114.2179 | C(11)-H(57) | 1.105  | C(20)-C(18)-C(19) | 59.946   |  |  | C(9)-C(8)-C(6)      | 109.3698 |
| C(4)-C(5)  | 1.5171 | H(88)-C(31)-O(36) | 106.8064 | C(11)-N(12) | 1.6154 | C(20)-C(18)-C(17) | 91.3217  |  |  | H(37)-C(7)-H(36)    | 114.7615 |
| C(3)-H(41) | 1.075  | H(88)-C(31)-C(29) | 101.7385 | C(10)-H(56) | 1.0777 | C(19)-C(18)-C(17) | 114.0999 |  |  | H(37)-C(7)-H(35)    | 108.9344 |
| C(3)-C(4)  | 1.5229 | H(87)-C(31)-O(36) | 113.852  | C(10)-H(54) | 1.0374 | H(78)-C(30)-H(77) | 97.4762  |  |  | H(37)-C(7)-O(26)    | 106.4877 |
| C(2)-H(40) | 1.1421 | H(87)-C(31)-C(29) | 114.5152 | C(10)-H(55) | 1.1215 | H(78)-C(30)-C(31) | 114.9111 |  |  | H(36)-C(7)-H(35)    | 104.894  |
| C(2)-C(3)  | 1.5911 | O(36)-C(31)-C(29) | 104.5072 | C(9)-H(52)  | 1.154  | H(78)-C(30)-C(29) | 106.9136 |  |  | H(36)-C(7)-O(26)    | 115.7814 |
| C(1)-O(35) | 1.395  | H(86)-C(30)-H(85) | 108.3189 | C(9)-H(53)  | 1.1182 | H(77)-C(30)-C(31) | 110.943  |  |  | H(35)-C(7)-O(26)    | 105.4476 |
| C(1)-C(2)  | 1.5176 | H(86)-C(30)-C(32) | 109.6571 | C(8)-H(50)  | 1.1589 | H(77)-C(30)-C(29) | 113.676  |  |  | Lp(64)-O(26)-Lp(63) | 123.4879 |
| C(1)-C(6)  | 1.5344 | H(86)-C(30)-N(11) | 117.3589 | C(8)-H(51)  | 1.0935 | C(31)-C(30)-C(29) | 112.1257 |  |  | Lp(64)-O(26)-C(7)   | 112.5334 |
|            |        | H(85)-C(30)-C(32) | 106.4253 | C(8)-C(9)   | 1.5247 | H(70)-C(25)-N(26) | 121.1269 |  |  | Lp(64)-O(26)-C(3)   | 103.8659 |
|            |        | H(85)-C(30)-N(11) | 104.9267 | C(7)-O(45)  | 1.4311 | H(70)-C(25)-C(24) | 110.791  |  |  | Lp(63)-O(26)-C(7)   | 103.0841 |
|            |        | C(32)-C(30)-N(11) | 109.5264 | C(7)-C(28)  | 1.5638 | N(26)-C(25)-C(24) | 106.8839 |  |  | Lp(63)-O(26)-C(3)   | 96.3492  |
|            |        | H(52)-C(13)-H(51) | 112.0893 | C(7)-C(27)  | 1.5135 | H(67)-C(22)-C(23) | 117.187  |  |  | C(7)-O(26)-C(3)     | 117.334  |
|            |        | H(52)-C(13)-C(14) | 106.9304 | C(7)-C(8)   | 1.5513 | H(67)-C(22)-C(14) | 110.9535 |  |  | Lp(60)-O(24)-Lp(59) | 113.233  |
|            |        | H(52)-C(13)-C(7)  | 95.473   | C(6)-C(11)  | 1.5137 | C(23)-C(22)-C(14) | 110.4415 |  |  | Lp(60)-O(24)-H(34)  | 105.3704 |
|            |        | H(51)-C(13)-C(14) | 104.0708 | C(5)-C(9)   | 1.5474 | H(63)-C(17)-N(21) | 103.8732 |  |  | Lp(60)-O(24)-C(1)   | 109.2172 |

|  |  |                               |          |                |        |                               |          |  |  |                            |          |
|--|--|-------------------------------|----------|----------------|--------|-------------------------------|----------|--|--|----------------------------|----------|
|  |  | H(51)-<br>C(13)-<br>C(7)      | 119.7201 | C(5)-<br>C(6)  | 1.5064 | H(63)-<br>C(17)-<br>C(18)     | 124.5097 |  |  | Lp(59)-<br>O(24)-<br>H(34) | 115.3431 |
|  |  | C(14)-<br>C(13)-<br>C(7)      | 117.8954 | C(4)-<br>O(45) | 1.3475 | H(63)-<br>C(17)-<br>C(16)     | 113.968  |  |  | Lp(59)-<br>O(24)-<br>C(1)  | 105.7432 |
|  |  | Lp(101)-<br>O(39)-<br>Lp(100) | 102.6587 | C(4)-<br>C(5)  | 1.4872 | N(21)-<br>C(17)-<br>C(18)     | 92.2116  |  |  | H(34)-<br>O(24)-<br>C(1)   | 107.7543 |
|  |  | Lp(101)-<br>O(39)-<br>V(38)   | 107.6737 | C(3)-<br>C(10) | 1.4903 | N(21)-<br>C(17)-<br>C(16)     | 61.1976  |  |  | O(25)-<br>C(5)-<br>C(6)    | 105.8177 |
|  |  | Lp(100)-<br>O(39)-<br>V(38)   | 110.5081 | C(3)-<br>C(4)  | 1.5208 | C(18)-<br>C(17)-<br>C(16)     | 120.2176 |  |  | O(25)-<br>C(5)-<br>C(4)    | 111.2794 |
|  |  | Lp(99)-<br>O(37)-<br>Lp(98)   | 128.4513 | C(2)-<br>H(49) | 1.1035 | H(60)-<br>C(29)-<br>H(76)     | 110.3606 |  |  | C(6)-<br>C(5)-<br>C(4)     | 120.7533 |
|  |  | Lp(99)-<br>O(37)-<br>V(38)    | 100.9398 | C(2)-<br>C(3)  | 1.6245 | H(60)-<br>C(29)-<br>C(30)     | 108.4833 |  |  | C(8)-<br>C(6)-<br>C(5)     | 108.7792 |
|  |  | Lp(99)-<br>O(37)-<br>C(32)    | 105.8686 | C(1)-<br>O(46) | 1.3919 | H(60)-<br>C(29)-<br>C(28)     | 108.2266 |  |  | C(8)-<br>C(6)-<br>C(1)     | 114.9137 |
|  |  | Lp(98)-<br>O(37)-<br>V(38)    | 100.797  | C(1)-<br>C(2)  | 1.5759 | H(76)-<br>C(29)-<br>C(30)     | 109.9052 |  |  | C(5)-<br>C(6)-<br>C(1)     | 111.7353 |
|  |  | Lp(98)-<br>O(37)-<br>C(32)    | 100.6107 | C(1)-<br>C(6)  | 1.5227 | H(76)-<br>C(29)-<br>C(28)     | 107.8372 |  |  | C(13)-<br>C(4)-<br>C(5)    | 113.6076 |
|  |  | V(38)-<br>O(37)-<br>C(32)     | 122.4632 |                |        | C(30)-<br>C(29)-<br>C(28)     | 112.0173 |  |  | C(13)-<br>C(4)-<br>C(3)    | 106.8028 |
|  |  | Lp(97)-<br>O(36)-<br>Lp(96)   | 130.6954 |                |        | N(21)-<br>C(16)-<br>C(17)     | 61.1556  |  |  | C(5)-<br>C(4)-<br>C(3)     | 117.2912 |
|  |  | Lp(97)-<br>O(36)-<br>V(38)    | 100.5367 |                |        | N(21)-<br>C(16)-<br>C(15)     | 107.7194 |  |  | O(26)-<br>C(3)-<br>C(4)    | 113.8774 |
|  |  | Lp(97)-<br>O(36)-<br>C(31)    | 95.4351  |                |        | C(17)-<br>C(16)-<br>C(15)     | 121.6345 |  |  | O(26)-<br>C(3)-<br>C(2)    | 111.0579 |
|  |  | Lp(96)-<br>O(36)-<br>V(38)    | 114.1154 |                |        | C(22)-<br>C(14)-<br>N(26)     | 117.3082 |  |  | C(4)-<br>C(3)-<br>C(2)     | 104.3905 |
|  |  | Lp(96)-<br>O(36)-<br>C(31)    | 104.0407 |                |        | C(22)-<br>C(14)-<br>C(13)     | 111.7757 |  |  | H(33)-<br>C(2)-<br>C(3)    | 107.4754 |
|  |  | V(38)-<br>O(36)-<br>C(31)     | 109.6106 |                |        | N(26)-<br>C(14)-<br>C(13)     | 110.5214 |  |  | H(33)-<br>C(2)-<br>C(1)    | 114.1261 |
|  |  | H(84)-<br>C(29)-<br>H(83)     | 102.8481 |                |        | Lp(114)-<br>O(48)-<br>Lp(113) | 108.9667 |  |  | C(3)-<br>C(2)-<br>C(1)     | 118.0182 |
|  |  | H(84)-<br>C(29)-<br>C(31)     | 109.4431 |                |        | Lp(114)-<br>O(48)-<br>V(47)   | 105.0933 |  |  | O(24)-<br>C(1)-<br>C(6)    | 110.7891 |
|  |  | H(84)-<br>C(29)-<br>N(11)     | 119.107  |                |        | Lp(113)-<br>O(48)-<br>V(47)   | 102.3427 |  |  | O(24)-<br>C(1)-<br>C(2)    | 109.3416 |
|  |  | H(83)-<br>C(29)-<br>C(31)     | 113.1464 |                |        | H(75)-<br>C(28)-<br>H(74)     | 104.9359 |  |  | C(6)-<br>C(1)-<br>C(2)     | 115.4407 |
|  |  | H(83)-<br>C(29)-<br>N(11)     | 108.2998 |                |        | H(75)-<br>C(28)-<br>C(29)     | 109.4893 |  |  |                            |          |
|  |  | C(31)-<br>C(29)-<br>N(11)     | 104.2991 |                |        | H(75)-<br>C(28)-<br>C(7)      | 109.2994 |  |  |                            |          |

|  |  |                            |          |  |  |                             |          |  |  |  |  |
|--|--|----------------------------|----------|--|--|-----------------------------|----------|--|--|--|--|
|  |  | H(50)-<br>C(12)-<br>H(49)  | 116.1583 |  |  | H(74)-<br>C(28)-<br>C(29)   | 105.3994 |  |  |  |  |
|  |  | H(50)-<br>C(12)-<br>H(33)  | 111.5131 |  |  | H(74)-<br>C(28)-<br>C(7)    | 110.8725 |  |  |  |  |
|  |  | H(50)-<br>C(12)-<br>C(7)   | 114.1095 |  |  | C(29)-<br>C(28)-<br>C(7)    | 116.2122 |  |  |  |  |
|  |  | H(49)-<br>C(12)-<br>H(33)  | 109.2996 |  |  | Lp(108)-<br>N(26)-<br>V(47) | 108.3433 |  |  |  |  |
|  |  | H(49)-<br>C(12)-<br>C(7)   | 109.0722 |  |  | Lp(108)-<br>N(26)-<br>C(25) | 101.2925 |  |  |  |  |
|  |  | H(33)-<br>C(12)-<br>C(7)   | 94.5626  |  |  | Lp(108)-<br>N(26)-<br>C(14) | 113.6835 |  |  |  |  |
|  |  | Lp(91)-<br>N(11)-<br>V(38) | 177.0948 |  |  | V(47)-<br>N(26)-<br>C(25)   | 116.0543 |  |  |  |  |
|  |  | Lp(91)-<br>N(11)-<br>C(30) | 73.1666  |  |  | V(47)-<br>N(26)-<br>C(14)   | 108.375  |  |  |  |  |
|  |  | Lp(91)-<br>N(11)-<br>C(29) | 75.7478  |  |  | C(25)-<br>N(26)-<br>C(14)   | 109.1356 |  |  |  |  |
|  |  | Lp(91)-<br>N(11)-<br>C(10) | 62.1786  |  |  | H(62)-<br>C(15)-<br>H(61)   | 102.2471 |  |  |  |  |
|  |  | V(38)-<br>N(11)-<br>C(30)  | 109.2315 |  |  | H(62)-<br>C(15)-<br>C(16)   | 119.3638 |  |  |  |  |
|  |  | V(38)-<br>N(11)-<br>C(29)  | 104.055  |  |  | H(62)-<br>C(15)-<br>N(12)   | 101.3141 |  |  |  |  |
|  |  | V(38)-<br>N(11)-<br>C(10)  | 115.37   |  |  | H(61)-<br>C(15)-<br>C(16)   | 117.3592 |  |  |  |  |
|  |  | C(30)-<br>N(11)-<br>C(29)  | 119.6794 |  |  | H(61)-<br>C(15)-<br>N(12)   | 109.5733 |  |  |  |  |
|  |  | C(30)-<br>N(11)-<br>C(10)  | 101.3109 |  |  | C(16)-<br>C(15)-<br>N(12)   | 105.7056 |  |  |  |  |
|  |  | C(29)-<br>N(11)-<br>C(10)  | 107.756  |  |  | H(72)-<br>C(27)-<br>H(71)   | 102.654  |  |  |  |  |
|  |  | H(43)-<br>C(8)-<br>H(42)   | 107.7279 |  |  | H(72)-<br>C(27)-<br>H(73)   | 115.6165 |  |  |  |  |
|  |  | H(43)-<br>C(8)-<br>C(9)    | 111.8495 |  |  | H(72)-<br>C(27)-<br>C(7)    | 111.9112 |  |  |  |  |
|  |  | H(43)-<br>C(8)-<br>C(7)    | 105.9436 |  |  | H(71)-<br>C(27)-<br>H(73)   | 97.9442  |  |  |  |  |
|  |  | H(42)-<br>C(8)-<br>C(9)    | 108.871  |  |  | H(71)-<br>C(27)-<br>C(7)    | 116.4436 |  |  |  |  |
|  |  | H(42)-<br>C(8)-<br>C(7)    | 106.9444 |  |  | H(73)-<br>C(27)-<br>C(7)    | 111.4438 |  |  |  |  |
|  |  | C(9)-<br>C(8)-<br>C(7)     | 115.1565 |  |  | Lp(107)-<br>N(21)-<br>V(47) | 116.0809 |  |  |  |  |
|  |  | O(34)-<br>C(7)-<br>C(8)    | 106.6377 |  |  | Lp(107)-<br>N(21)-<br>C(20) | 82.2074  |  |  |  |  |

|  |  |                             |          |  |  |                             |          |  |  |  |  |
|--|--|-----------------------------|----------|--|--|-----------------------------|----------|--|--|--|--|
|  |  | O(34)-<br>C(7)-<br>C(13)    | 110.6437 |  |  | Lp(107)-<br>N(21)-<br>C(17) | 114.9605 |  |  |  |  |
|  |  | O(34)-<br>C(7)-<br>C(12)    | 99.5758  |  |  | Lp(107)-<br>N(21)-<br>C(16) | 70.7552  |  |  |  |  |
|  |  | C(8)-<br>C(7)-<br>C(13)     | 115.4429 |  |  | V(47)-<br>N(21)-<br>C(20)   | 131.7141 |  |  |  |  |
|  |  | C(8)-<br>C(7)-<br>C(12)     | 103.0041 |  |  | V(47)-<br>N(21)-<br>C(17)   | 121.4431 |  |  |  |  |
|  |  | C(13)-<br>C(7)-<br>C(12)    | 119.7351 |  |  | V(47)-<br>N(21)-<br>C(16)   | 117.7772 |  |  |  |  |
|  |  | O(39)-<br>V(38)-<br>O(37)   | 86.6932  |  |  | C(20)-<br>N(21)-<br>C(17)   | 81.5085  |  |  |  |  |
|  |  | O(39)-<br>V(38)-<br>O(36)   | 90.5477  |  |  | C(20)-<br>N(21)-<br>C(16)   | 110.3837 |  |  |  |  |
|  |  | O(39)-<br>V(38)-<br>O(35)   | 109.9562 |  |  | C(17)-<br>N(21)-<br>C(16)   | 57.6468  |  |  |  |  |
|  |  | O(39)-<br>V(38)-<br>N(11)   | 154.9069 |  |  | H(59)-<br>C(13)-<br>H(44)   | 115.509  |  |  |  |  |
|  |  | O(37)-<br>V(38)-<br>O(36)   | 144.8552 |  |  | H(59)-<br>C(13)-<br>C(14)   | 102.6951 |  |  |  |  |
|  |  | O(37)-<br>V(38)-<br>O(35)   | 95.5865  |  |  | H(59)-<br>C(13)-<br>N(12)   | 111.5967 |  |  |  |  |
|  |  | O(37)-<br>V(38)-<br>N(11)   | 80.6065  |  |  | H(44)-<br>C(13)-<br>C(14)   | 101.4893 |  |  |  |  |
|  |  | O(36)-<br>V(38)-<br>O(35)   | 118.1078 |  |  | H(44)-<br>C(13)-<br>N(12)   | 117.9034 |  |  |  |  |
|  |  | O(36)-<br>V(38)-<br>N(11)   | 87.6092  |  |  | C(14)-<br>C(13)-<br>N(12)   | 105.1886 |  |  |  |  |
|  |  | O(35)-<br>V(38)-<br>N(11)   | 92.8472  |  |  | Lp(106)-<br>N(12)-<br>V(47) | 147.0134 |  |  |  |  |
|  |  | Lp(93)-<br>O(34)-<br>Lp(92) | 139.456  |  |  | Lp(106)-<br>N(12)-<br>C(13) | 53.4913  |  |  |  |  |
|  |  | Lp(93)-<br>O(34)-<br>C(7)   | 108.7266 |  |  | Lp(106)-<br>N(12)-<br>C(15) | 69.9451  |  |  |  |  |
|  |  | Lp(93)-<br>O(34)-<br>C(4)   | 102.9893 |  |  | Lp(106)-<br>N(12)-<br>C(11) | 95.0011  |  |  |  |  |
|  |  | Lp(92)-<br>O(34)-<br>C(7)   | 95.3336  |  |  | V(47)-<br>N(12)-<br>C(13)   | 104.4836 |  |  |  |  |
|  |  | Lp(92)-<br>O(34)-<br>C(4)   | 97.8075  |  |  | V(47)-<br>N(12)-<br>C(15)   | 116.2959 |  |  |  |  |
|  |  | C(7)-<br>O(34)-<br>C(4)     | 111.0466 |  |  | V(47)-<br>N(12)-<br>C(11)   | 114.5896 |  |  |  |  |
|  |  | H(47)-<br>C(10)-<br>H(46)   | 106.0921 |  |  | C(13)-<br>N(12)-<br>C(15)   | 121.2032 |  |  |  |  |
|  |  | H(47)-<br>C(10)-<br>N(11)   | 107.9786 |  |  | C(13)-<br>N(12)-<br>C(11)   | 100.281  |  |  |  |  |

|  |  |                             |          |  |  |                           |          |  |  |  |  |
|--|--|-----------------------------|----------|--|--|---------------------------|----------|--|--|--|--|
|  |  | H(47)-<br>C(10)-<br>C(6)    | 111.1957 |  |  | C(15)-<br>N(12)-<br>C(11) | 99.109   |  |  |  |  |
|  |  | H(46)-<br>C(10)-<br>N(11)   | 112.2693 |  |  | H(50)-<br>C(8)-<br>H(51)  | 106.9702 |  |  |  |  |
|  |  | H(46)-<br>C(10)-<br>C(6)    | 111.2132 |  |  | H(50)-<br>C(8)-<br>C(9)   | 110.5631 |  |  |  |  |
|  |  | N(11)-<br>C(10)-<br>C(6)    | 108.0715 |  |  | H(50)-<br>C(8)-<br>C(7)   | 112.7591 |  |  |  |  |
|  |  | H(45)-<br>C(9)-<br>H(44)    | 105.3691 |  |  | H(51)-<br>C(8)-<br>C(9)   | 109.9518 |  |  |  |  |
|  |  | H(45)-<br>C(9)-<br>C(8)     | 112.756  |  |  | H(51)-<br>C(8)-<br>C(7)   | 111.258  |  |  |  |  |
|  |  | H(45)-<br>C(9)-<br>C(5)     | 110.7999 |  |  | C(9)-<br>C(8)-<br>C(7)    | 105.3731 |  |  |  |  |
|  |  | H(44)-<br>C(9)-<br>C(8)     | 103.1854 |  |  | O(45)-<br>C(7)-<br>C(28)  | 112.2712 |  |  |  |  |
|  |  | H(44)-<br>C(9)-<br>C(5)     | 115.3451 |  |  | O(45)-<br>C(7)-<br>C(27)  | 107.6925 |  |  |  |  |
|  |  | C(8)-<br>C(9)-<br>C(5)      | 109.2232 |  |  | O(45)-<br>C(7)-<br>C(8)   | 106.2602 |  |  |  |  |
|  |  | Lp(95)-<br>O(35)-<br>Lp(94) | 130.1833 |  |  | C(28)-<br>C(7)-<br>C(27)  | 109.7607 |  |  |  |  |
|  |  | Lp(95)-<br>O(35)-<br>V(38)  | 110.0048 |  |  | C(28)-<br>C(7)-<br>C(8)   | 115.1572 |  |  |  |  |
|  |  | Lp(95)-<br>O(35)-<br>C(1)   | 99.9149  |  |  | C(27)-<br>C(7)-<br>C(8)   | 105.2181 |  |  |  |  |
|  |  | Lp(94)-<br>O(35)-<br>V(38)  | 107.2565 |  |  | O(48)-<br>V(47)-<br>O(46) | 108.9599 |  |  |  |  |
|  |  | Lp(94)-<br>O(35)-<br>C(1)   | 94.1248  |  |  | O(48)-<br>V(47)-<br>N(26) | 93.6983  |  |  |  |  |
|  |  | V(38)-<br>O(35)-<br>C(1)    | 113.6578 |  |  | O(48)-<br>V(47)-<br>N(21) | 91.5613  |  |  |  |  |
|  |  | C(9)-<br>C(5)-<br>C(6)      | 118.7321 |  |  | O(48)-<br>V(47)-<br>N(12) | 148.0438 |  |  |  |  |
|  |  | C(9)-<br>C(5)-<br>C(4)      | 121.3776 |  |  | O(46)-<br>V(47)-<br>N(26) | 92.6145  |  |  |  |  |
|  |  | C(6)-<br>C(5)-<br>C(4)      | 111.2597 |  |  | O(46)-<br>V(47)-<br>N(21) | 94.0162  |  |  |  |  |
|  |  | C(10)-<br>C(6)-<br>C(5)     | 115.5032 |  |  | O(46)-<br>V(47)-<br>N(12) | 102.0567 |  |  |  |  |
|  |  | C(10)-<br>C(6)-<br>C(1)     | 118.4238 |  |  | N(26)-<br>V(47)-<br>N(21) | 169.7248 |  |  |  |  |
|  |  | C(5)-<br>C(6)-<br>C(1)      | 108.4267 |  |  | N(26)-<br>V(47)-<br>N(12) | 92.3718  |  |  |  |  |
|  |  | O(34)-<br>C(4)-<br>C(5)     | 114.4138 |  |  | N(21)-<br>V(47)-<br>N(12) | 78.5726  |  |  |  |  |

|  |  |                         |          |  |  |                               |          |  |  |  |  |
|--|--|-------------------------|----------|--|--|-------------------------------|----------|--|--|--|--|
|  |  | O(34)-<br>C(4)-<br>C(3) | 103.0361 |  |  | Lp(110)-<br>O(45)-<br>Lp(109) | 125.2456 |  |  |  |  |
|  |  | C(5)-<br>C(4)-<br>C(3)  | 105.2148 |  |  | Lp(110)-<br>O(45)-<br>C(7)    | 114.3777 |  |  |  |  |
|  |  | H(41)-<br>C(3)-<br>C(4) | 114.3808 |  |  | Lp(110)-<br>O(45)-<br>C(4)    | 101.2956 |  |  |  |  |
|  |  | H(41)-<br>C(3)-<br>C(2) | 112.116  |  |  | Lp(109)-<br>O(45)-<br>C(7)    | 108.6795 |  |  |  |  |
|  |  | C(4)-<br>C(3)-<br>C(2)  | 113.3737 |  |  | Lp(109)-<br>O(45)-<br>C(4)    | 99.5762  |  |  |  |  |
|  |  | H(40)-<br>C(2)-<br>C(3) | 118.5748 |  |  | C(7)-<br>O(45)-<br>C(4)       | 103.7792 |  |  |  |  |
|  |  | H(40)-<br>C(2)-<br>C(1) | 109.012  |  |  | H(58)-<br>C(11)-<br>H(57)     | 106.3229 |  |  |  |  |
|  |  | C(3)-<br>C(2)-<br>C(1)  | 110.5741 |  |  | H(58)-<br>C(11)-<br>N(12)     | 104.5078 |  |  |  |  |
|  |  | O(35)-<br>C(1)-<br>C(2) | 112.5904 |  |  | H(58)-<br>C(11)-<br>C(6)      | 111.7462 |  |  |  |  |
|  |  | O(35)-<br>C(1)-<br>C(6) | 108.7072 |  |  | H(57)-<br>C(11)-<br>N(12)     | 113.4222 |  |  |  |  |
|  |  | C(2)-<br>C(1)-<br>C(6)  | 113.8516 |  |  | H(57)-<br>C(11)-<br>C(6)      | 109.6549 |  |  |  |  |
|  |  |                         |          |  |  | N(12)-<br>C(11)-<br>C(6)      | 111.0256 |  |  |  |  |
|  |  |                         |          |  |  | H(52)-<br>C(9)-<br>H(53)      | 104.631  |  |  |  |  |
|  |  |                         |          |  |  | H(52)-<br>C(9)-<br>C(8)       | 109.651  |  |  |  |  |
|  |  |                         |          |  |  | H(52)-<br>C(9)-<br>C(5)       | 115.3488 |  |  |  |  |
|  |  |                         |          |  |  | H(53)-<br>C(9)-<br>C(8)       | 103.5982 |  |  |  |  |
|  |  |                         |          |  |  | H(53)-<br>C(9)-<br>C(5)       | 109.0394 |  |  |  |  |
|  |  |                         |          |  |  | C(8)-<br>C(9)-<br>C(5)        | 113.5233 |  |  |  |  |
|  |  |                         |          |  |  | Lp(112)-<br>O(46)-<br>Lp(111) | 119.6283 |  |  |  |  |
|  |  |                         |          |  |  | Lp(112)-<br>O(46)-<br>V(47)   | 104.8797 |  |  |  |  |
|  |  |                         |          |  |  | Lp(112)-<br>O(46)-<br>C(1)    | 104.0545 |  |  |  |  |
|  |  |                         |          |  |  | Lp(111)-<br>O(46)-<br>V(47)   | 108.9594 |  |  |  |  |
|  |  |                         |          |  |  | Lp(111)-<br>O(46)-<br>C(1)    | 104.9981 |  |  |  |  |

|  |  |  |  |  |  |                           |          |  |  |  |  |  |  |
|--|--|--|--|--|--|---------------------------|----------|--|--|--|--|--|--|
|  |  |  |  |  |  | V(47)-<br>O(46)-<br>C(1)  | 114.6588 |  |  |  |  |  |  |
|  |  |  |  |  |  | H(56)-<br>C(10)-<br>H(54) | 106.0365 |  |  |  |  |  |  |
|  |  |  |  |  |  | H(56)-<br>C(10)-<br>H(55) | 104.5661 |  |  |  |  |  |  |
|  |  |  |  |  |  | H(56)-<br>C(10)-<br>C(3)  | 118.6336 |  |  |  |  |  |  |
|  |  |  |  |  |  | H(54)-<br>C(10)-<br>H(55) | 108.3701 |  |  |  |  |  |  |
|  |  |  |  |  |  | H(54)-<br>C(10)-<br>C(3)  | 112.5787 |  |  |  |  |  |  |
|  |  |  |  |  |  | H(55)-<br>C(10)-<br>C(3)  | 106.0289 |  |  |  |  |  |  |
|  |  |  |  |  |  | C(9)-<br>C(5)-<br>C(6)    | 111.0769 |  |  |  |  |  |  |
|  |  |  |  |  |  | C(9)-<br>C(5)-<br>C(4)    | 109.1877 |  |  |  |  |  |  |
|  |  |  |  |  |  | C(6)-<br>C(5)-<br>C(4)    | 113.9578 |  |  |  |  |  |  |
|  |  |  |  |  |  | C(11)-<br>C(6)-<br>C(5)   | 124.1736 |  |  |  |  |  |  |
|  |  |  |  |  |  | C(11)-<br>C(6)-<br>C(1)   | 100.4916 |  |  |  |  |  |  |
|  |  |  |  |  |  | C(5)-<br>C(6)-<br>C(1)    | 109.2343 |  |  |  |  |  |  |
|  |  |  |  |  |  | O(45)-<br>C(4)-<br>C(5)   | 117.9441 |  |  |  |  |  |  |
|  |  |  |  |  |  | O(45)-<br>C(4)-<br>C(3)   | 111.7761 |  |  |  |  |  |  |
|  |  |  |  |  |  | C(5)-<br>C(4)-<br>C(3)    | 112.4239 |  |  |  |  |  |  |
|  |  |  |  |  |  | C(10)-<br>C(3)-<br>C(4)   | 109.7825 |  |  |  |  |  |  |
|  |  |  |  |  |  | C(10)-<br>C(3)-<br>C(2)   | 104.7664 |  |  |  |  |  |  |
|  |  |  |  |  |  | C(4)-<br>C(3)-<br>C(2)    | 116.4556 |  |  |  |  |  |  |
|  |  |  |  |  |  | H(49)-<br>C(2)-<br>C(3)   | 105.832  |  |  |  |  |  |  |
|  |  |  |  |  |  | H(49)-<br>C(2)-<br>C(1)   | 105.4882 |  |  |  |  |  |  |
|  |  |  |  |  |  | C(3)-<br>C(2)-<br>C(1)    | 109.0221 |  |  |  |  |  |  |
|  |  |  |  |  |  | O(46)-<br>C(1)-<br>C(2)   | 104.755  |  |  |  |  |  |  |



|  |  |  |  |  |  |                         |          |  |  |  |  |
|--|--|--|--|--|--|-------------------------|----------|--|--|--|--|
|  |  |  |  |  |  | O(46)-<br>C(1)-<br>C(6) | 112.1162 |  |  |  |  |
|  |  |  |  |  |  | C(2)-<br>C(1)-<br>C(6)  | 119.4953 |  |  |  |  |
